# Supplementary material for: Investigating the mechanism of catalytic reduction of silver nitrate on the surface of barium titanate at room temperature: oxygen vacancies play a key role
Source: Royal Society of Chemistry journal article supplement (doi:10.1039/c4ra12665c), 2014-12-04
Supplement: c4ra12665c1.pdf [file c4ra12665c1.pdf]

## Supporting Information

### Investigating the Mechanism of Catalytic Reduction of Silver Nitrate on the Surface of Barium Titanate at Room Temperature: Oxygen Vacancies Play a Key Role

Suibin Luo,<sup>a</sup> Shuhui Yu,<sup>a\*</sup> Fang Fang,<sup>a</sup> Maobai Lai,<sup>a</sup> Rong Sun<sup>a\*</sup> and Ching-Ping Wong<sup>b</sup>

<sup>a</sup> Center for Advanced Materials, Shenzhen Institutes of Advanced Technology, Chinese Academy of Sciences, Shenzhen, 518055, China

<sup>b</sup> Department of Electronics Engineering, The Chinese University of Hong Kong, Hong Kong, China

#### 1. Details of Experimental procedures

**Materials:** The BaTiO<sub>3</sub> (100 nm) nanoparticles were obtained from Shandong Guoci Functional Materials Co. China with the trade name of GC-BT-01. Silver nitrate (AgNO<sub>3</sub>) and Hydrogen Peroxide (30 wt%) were supplied by Guoyao Chemical Co. China. Ethylene glycol was achieved from Shanghai Lingfeng Chemical Co. China.

**Preparing BT-H particles:** 10 g BT was stirred under ultrasonic treatment in a 80 ml aqueous solution of H<sub>2</sub>O<sub>2</sub> for 30 min and then refluxed at 105 °C for 6 hours. The obtained suspension was rinsed and centrifuged three times with deionized water and ethanol. The nanoparticles were dried in vacuum desiccator for 1d at room temperature.

**Preparing BT-T particles:** The BT-T particles were obtained through thermal treated at 350 °C in muffle furnace for 10 hours.

**Preparing BT-Ag particles:** AgNO<sub>3</sub> (0.2 g) was dissolved in 12 ml ethylene glycol solution under magnetic stirring. Then 0.2 g BT added into the solution and magnetic stirring for 2 hours at room temperature. The color changing progress was recorded with camera. Photographs were gathered every 10 min from 0 min to 120 min.

**Characterization:** Scanning electron microscope (FEI Nova NanoSEM450) and Transmission electron microscope (TEM, FEI Tecnai Spirit) were employed to observe the microscopic structure of BT-Ag hybrid particles. The surface chemistry of BT particles was characterized by FTIR (Vertex 70, Bruker) and XPS (PHI 1800, VLVAC-PHI).

## 2. Photographs of BT suspension

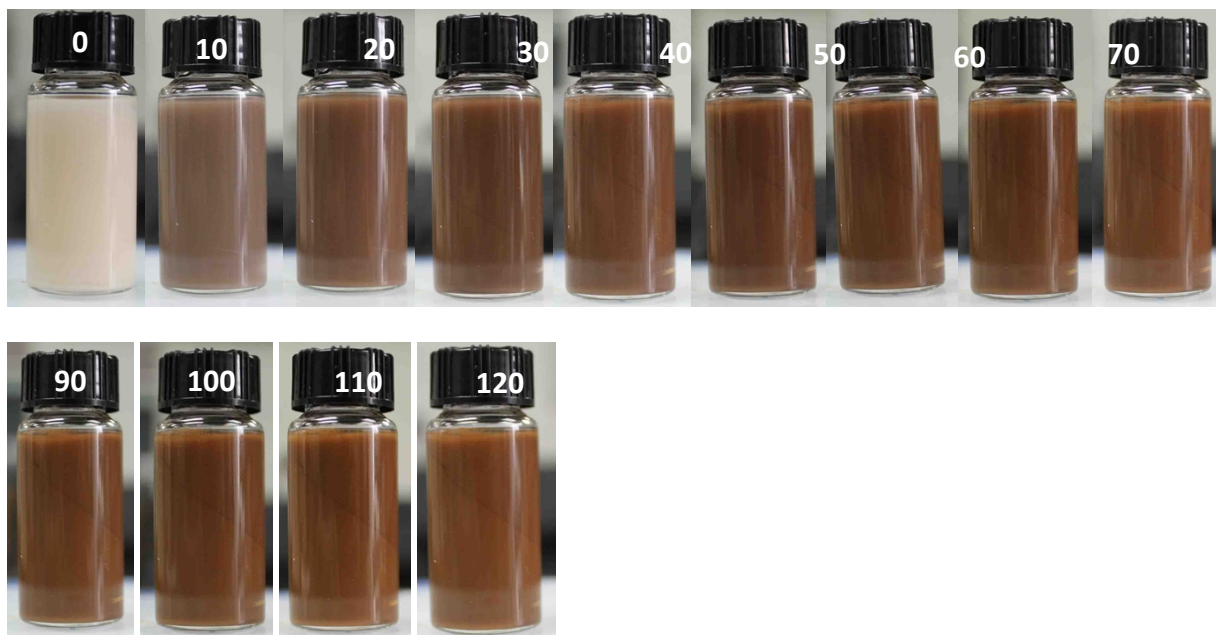

Figure S1 Photographs of BT-T/AgNO<sub>3</sub>/EG suspension under magnetic stirring for 2 hours at room temperature. Photographs were gathered every 10 min from 0 min to 120 min.

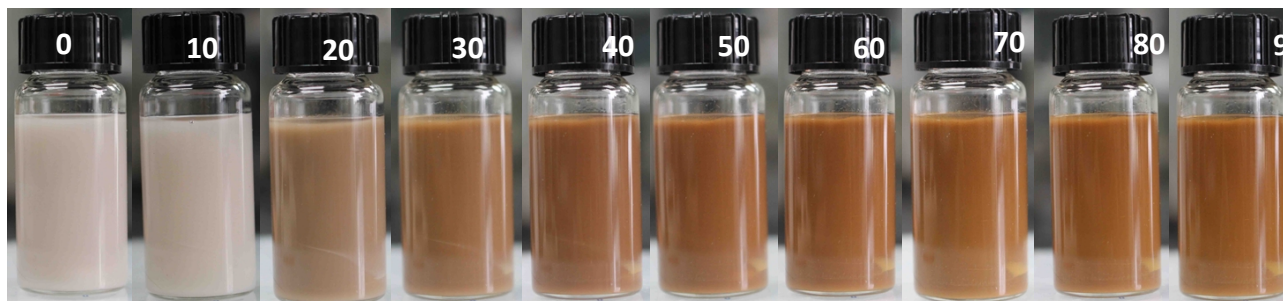

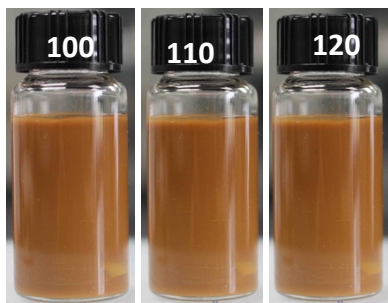

Figure S2 Photographs of BT-U/AgNO<sub>3</sub>/EG suspension under magnetic stirring for 2 hours at room temperature. Photographs were gathered every 10 min from 0 min to 120 min.

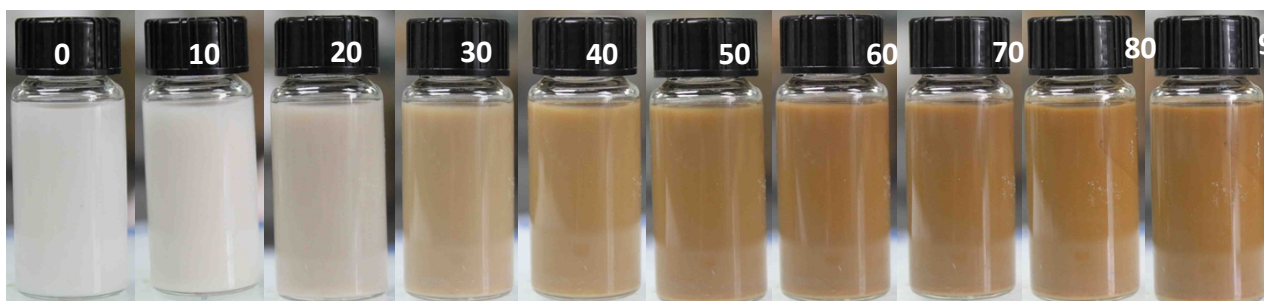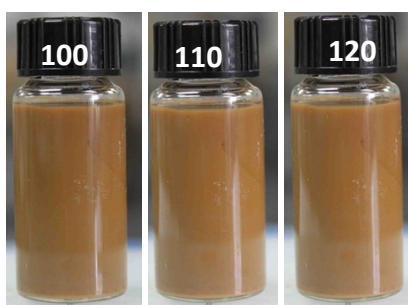

Figure S3 Photographs of BT-H/AgNO<sub>3</sub>/EG suspension under magnetic stirring for 2 hours at room temperature. Photographs were gathered every 10 min from 0 min to 120 min.

### 3. EDS analyze of the resultant BT-Ag particles

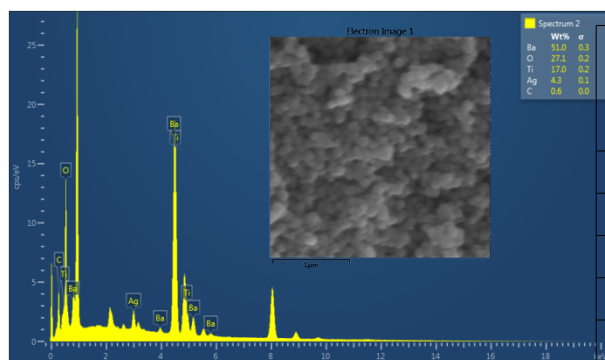

| Element | Apparent Concentration | Wt%    | Atomic % |
|---------|------------------------|--------|----------|
| C       | 6.27                   | 0.56   | 1.86     |
| O       | 41.83                  | 27.08  | 67.53    |
| Ti      | 30.99                  | 17.04  | 14.20    |
| Ag      | 7.22                   | 4.33   | 1.60     |
| Ba      | 88.87                  | 50.98  | 14.81    |
| Total:  |                        | 100.00 | 100.00   |

Figure S4 EDS analyze of BT (untreated)-Ag hybrid particles.

The EDS analyze of BT (untreated)-Ag hybrids shows that the content of silver in the hybrid was about 4.33 wt%. The results further indicated the small particles on BT surface was silver nanoparticles.

#### 4. FTIR of the solution after synthesis

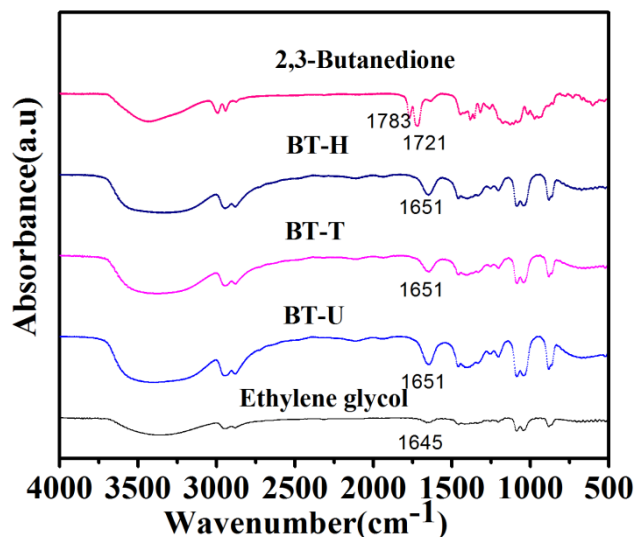

Figure.S5 FTIR spectra of the solution after synthesis.

The solution after synthesis was analyzed with FTIR. As illustrated by equations (1) (2) and scheme 1 in the manuscript, 2,3-Butanedione and water were produced after reaction. Thus, the FTIR was also carried out on 2,3-Butanedione for comparison. As shown in Figure R5 below, the absorption bands of 2,3-Butanedione at 1721 cm<sup>-1</sup> was observed which correspond to the stretching vibration of  $\text{-C=O}$ . A small absorption band of EG at 1645 cm<sup>-1</sup> corresponds to the absorbed water. The FTIR profiles of the solution after synthesis show absorption band at 1651 cm<sup>-1</sup>.

According to the reaction process, the EG acted as reducing agent and was consumed by a very small amount. 0.21677 mol EG was added in the reaction process and the consumed amount was 0.00118 mol. The content of the produced 2,3-Butanedione and water was 0.00118 mol, respectively. Therefore, the concentration of 2,3-Butanedione is very small. And, EG was polar solvent. So the absorption band at 1651 cm<sup>-1</sup> should be attribute to the overlap of the  $\text{-C=O}$  and water.
